# Supplementary material
Source: ML conference proceedings conference paper supplement (https://openreview.net/forum?id=jbnEOzIc8X)
Supplement: supplementary_material [file attachment]

# Supplementary Materials: Modality-Balanced Learning for Multimedia Recommendation

Anonymous Authors

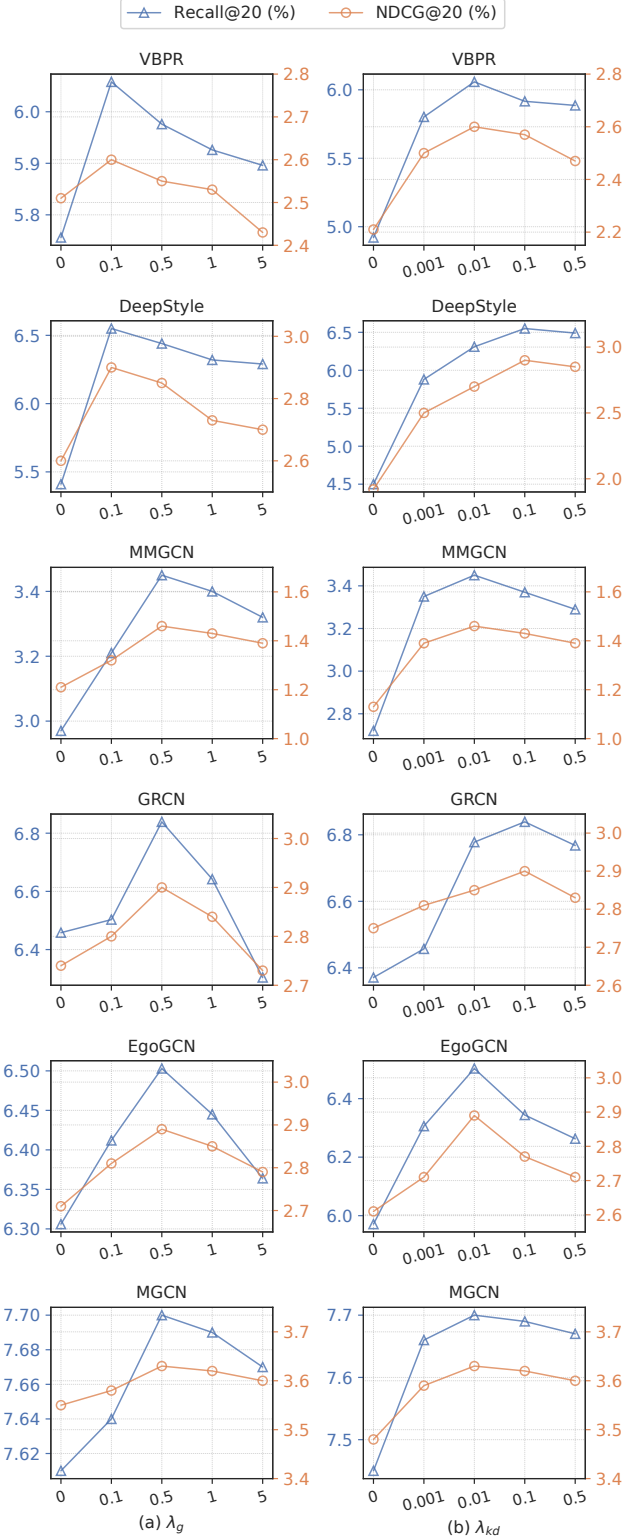

Figure 1: Performances comparison over different hyper-parameters settings on Amazon-Clothing dataset.

## 1 SENSITIVITY ANALYSIS

In this subsection, we examine the influence of different hyper-parameters on the performance of CKD. Specifically, we investigate the performance with respect to different  $\lambda_{kd}$  and  $\lambda_g$  values. Figure 1 reports the results of performance comparison. Our method gains significant improvement between  $\lambda_{kd} = 0$  and  $\lambda_{kd} = 0.001$ , which validates the rationality of our proposed KD framework. When  $\lambda_{kd}$  is small, not enough knowledge is distilled to the student model which results in deficient performance. When  $\lambda_{kd}$  is too large, it hampers the optimization of the BPR loss and yield degraded performance. Similarly, a large  $\lambda_g$  will cover up the specific distillation loss on training triples and cause degradation.

## 2 COMPREHENSIVE ABLATION RESULTS

Table 1: Ablation study results on generic distillation loss and re-weight paradigm in terms of Recall@20. The best performance is highlighted in bold.

| Model                    | Baby          | Sports        | Clothing      | Beauty        |
|--------------------------|---------------|---------------|---------------|---------------|
| DeepStyle + CKD          | <b>0.0613</b> | <b>0.0684</b> | <b>0.0655</b> | <b>0.1214</b> |
| w/o. Gen.                | 0.0486        | 0.0547        | 0.0541        | 0.1009        |
| w/o. re-weight           | 0.0492        | 0.0527        | 0.0412        | 0.0885        |
| repl. KL-divergence Loss | 0.0485        | 0.0522        | 0.0470        | 0.0914        |
| repl. MSE Loss           | 0.0559        | 0.0613        | 0.0588        | 0.1121        |
| GRCN + CKD               | <b>0.0866</b> | <b>0.0922</b> | <b>0.0667</b> | <b>0.1355</b> |
| w/o. Gen.                | 0.0844        | 0.0899        | 0.0654        | 0.1333        |
| w/o. re-weight           | 0.0851        | 0.0881        | 0.0649        | 0.1340        |
| repl. KL-divergence Loss | 0.0841        | 0.0915        | 0.0651        | <b>0.1362</b> |
| repl. MSE Loss           | 0.0834        | 0.0857        | 0.0633        | 0.1312        |
| MGCN + CKD               | <b>0.0710</b> | <b>0.0937</b> | <b>0.0770</b> | <b>0.1349</b> |
| w/o. Gen.                | 0.0689        | 0.0913        | 0.0761        | 0.1322        |
| w/o. re-weight           | 0.0677        | 0.0922        | 0.0764        | 0.1331        |
| repl. KL-divergence Loss | 0.0688        | 0.0913        | 0.0759        | 0.1328        |
| repl. MSE Loss           | 0.0691        | 0.0915        | 0.0755        | 0.1331        |

We present the ablation results of DeepStyle, GRCN, and MGCN in Table 1. We can observe that the results of these models' ablation experiments align with the results in Section 4.4. Each of these key components contributes substantially.
